# Supplementary material
Source: Royal Society of Chemistry journal article supplement (doi:10.1039/d6cp00198j)
Supplement: d6cp00198j1.pdf [file d6cp00198j1.pdf]

Equilibrium and kinetic aspects of Am/Eu pair extraction by bipyridine-based N-, O- donor ligand in different solvents

Ekaterina A. Konopkina <sup>\*a</sup>, Elizaveta A. Pavlova <sup>a</sup>, Alexander V. Gopin <sup>a</sup>, Maria G. Chernysheva <sup>a</sup>, Ali S. Mannaa <sup>b</sup>, Alexander A. Guda <sup>b</sup>, Nataliya E. Borisova <sup>a</sup>, Petr I. Matveev <sup>a</sup>

Konopkina.kate@gmail.com

<sup>a</sup> Department of Chemistry, Lomonosov Moscow State University, Moscow 119991, Russian Federation

<sup>b</sup> The Smart Materials Research Institute, Southern Federal University, Rostov-on-Don 344090, Russian Federation

## Solvent extraction

Table S1. Properties of diluents (T=298 K, P=0.1 MPa).

| Diluent            | Dielectric constant ( $\epsilon$ ) | Density, g/mL | Viscosity ( $\eta$ ), mPa $\times$ s | Polarizability ( $\pi^*$ )* |
|--------------------|------------------------------------|---------------|--------------------------------------|-----------------------------|
| Toluene            | 2.3                                | 0.87          | 0.59                                 | 0.51                        |
| 1,2-dichloroethane | 10.4                               | 1.25          | 0.83                                 | 0.58                        |
| F-3                | 22.3                               | 1.44          | 2.35                                 | -                           |
| FS-13              | 29                                 | 1.41          | 3.6                                  | -                           |
| Nitrobenzene       | 35                                 | 1.20          | 2.03                                 | 0.86                        |

Table S2. Extraction data for L, **Organic phase**:  $c(L) = 0.05 \text{ mol}\cdot\text{L}^{-1}$  in corresponding solvent, **Aqueous phase**:  $C(\text{HNO}_3) = 3 \text{ mol L}^{-1}$  with  $^{152}\text{Eu}(\text{III})$  and  $^{241}\text{Am}(\text{III})$  radiotracers. Temperature:  $22 \pm 1 \text{ }^\circ\text{C}$ .

| Diluent            | $D(\text{Am})$   | $D(\text{Eu})$  | $SF_{\text{Am/Eu}}$ |
|--------------------|------------------|-----------------|---------------------|
| Toluene            | $0.12 \pm 0.05$  | $0.08 \pm 0.02$ | $1.51 \pm 0.45$     |
| 1,2-dichloroethane | $2.14 \pm 0.13$  | $0.29 \pm 0.04$ | $7.51 \pm 0.47$     |
| F-3                | $3.34 \pm 0.01$  | $0.42 \pm 0.01$ | $7.98 \pm 0.20$     |
| FS-13              | $6.56 \pm 0.03$  | $0.73 \pm 0.02$ | $9.03 \pm 0.64$     |
| Nitrobenzene       | $10.15 \pm 0.24$ | $1.08 \pm 0.06$ | $9.40 \pm 0.55$     |

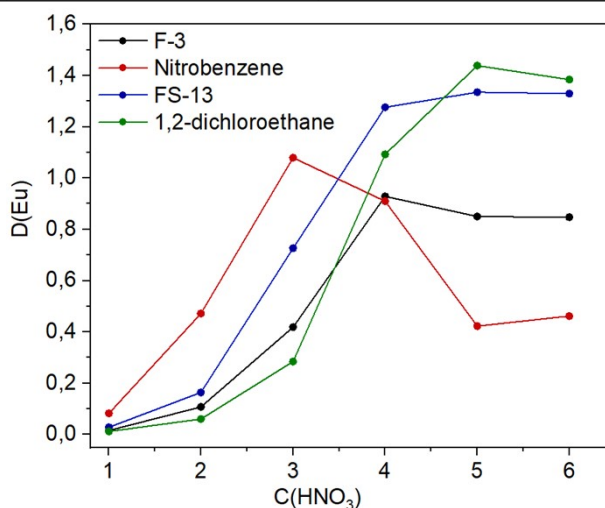

Figure S1. Extraction data for Eu, **Organic phase**:  $C(L) = 0.05 \text{ mol L}^{-1}$  in corresponding diluent, **Aqueous phase**:  $C(\text{HNO}_3) = 1-6 \text{ mol L}^{-1}$  with  $^{152}\text{Eu}(\text{III})$  and  $^{241}\text{Am}(\text{III})$  radiotracers. Temperature:  $22 \pm 1 \text{ }^\circ\text{C}$ . The uncertainties for  $D$  are 10% and 15% for SF.

## Kinetic Features

Table S3. Eu(III) interfacial mass transfer data in various diluents. The errors are obtained from the values of the standard deviation when performing the linear approximation.

| Diluent            | $k_{oa}$ , mm/s                 | $k_{ao}$ , mm/s                 | $k_{obs}$ , s <sup>-1</sup>     |
|--------------------|---------------------------------|---------------------------------|---------------------------------|
| F-3                | $(8,21 \pm 1,22) \cdot 10^{-4}$ | $(3,61 \pm 0,54) \cdot 10^{-4}$ | $(8,66 \pm 0,59) \cdot 10^{-3}$ |
| FS-13              | $(5,74 \pm 0,15) \cdot 10^{-4}$ | $(4,98 \pm 0,10) \cdot 10^{-4}$ | $(4,18 \pm 0,73) \cdot 10^{-3}$ |
| Nitrobenzene       | $(2,72 \pm 0,20) \cdot 10^{-4}$ | $(2,61 \pm 0,19) \cdot 10^{-4}$ | $(3,36 \pm 0,38) \cdot 10^{-3}$ |
| 1,2-dichloroethane | $(3,57 \pm 0,62) \cdot 10^{-4}$ | $(2,03 \pm 0,35) \cdot 10^{-4}$ | $(3,74 \pm 0,48) \cdot 10^{-3}$ |

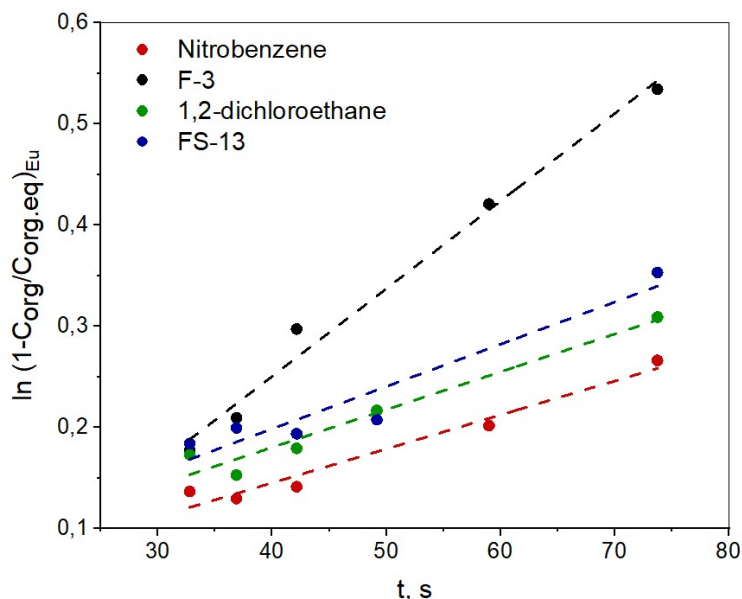

Figure S2. Observed rates for Eu(III) extraction. **Organic phase:**  $C(L) = 0.05 \text{ mol L}^{-1}$  in F-3, FS-13, nitrobenzene or 1,2-dichloroethane, **Aqueous phase:**  $C(\text{HNO}_3) = 3 \text{ mol L}^{-1}$  with  $^{152}\text{Eu}$ ,  $^{241}\text{Am}$  radiotracer,  $T = 23 \pm 1 \text{ }^\circ\text{C}$ .

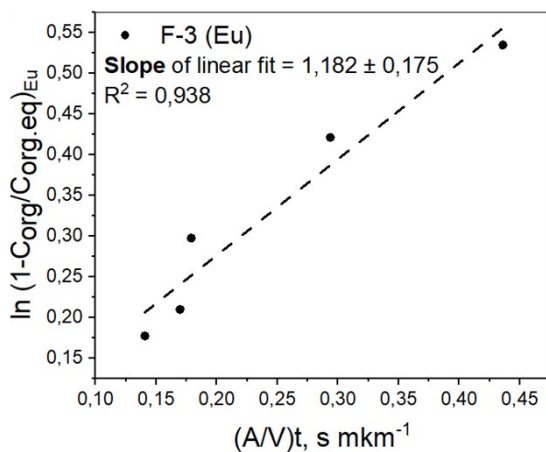

a)

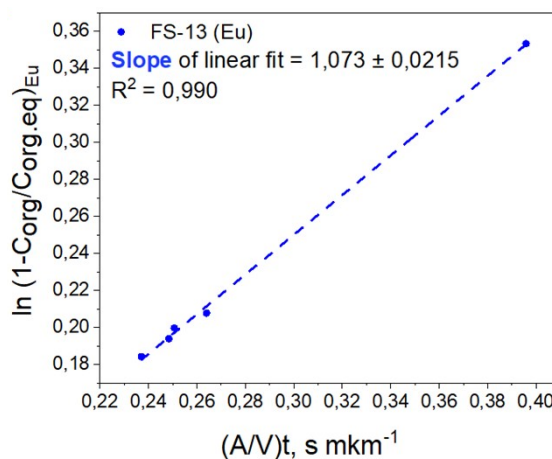

b)

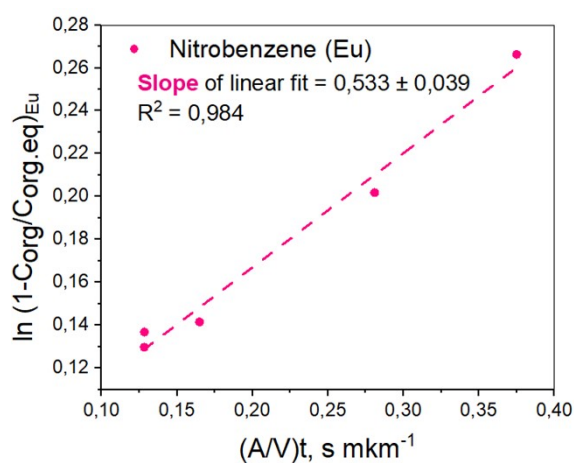

c)

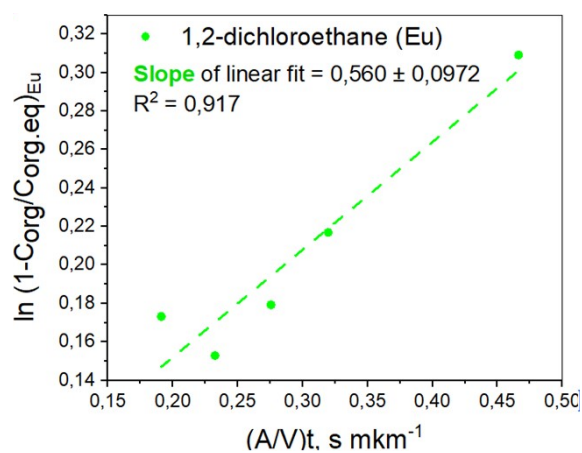

d)

Figure S3. mass transfer rates ( $k_{oa}$ ) for Eu(III) extraction. Aqueous phase:  $HNO_3\ 3\ mol\ L^{-1}$  with  $^{152}Eu$  radiotracer, organic phase:  $C(L) = 0.01\ mol\ L^{-1}$ , in a) F-3, b) FS-13, c) Nitrobenzene and d) 1,2-dichloroethane,  $T = 23 \pm 1\ ^\circ C$ .

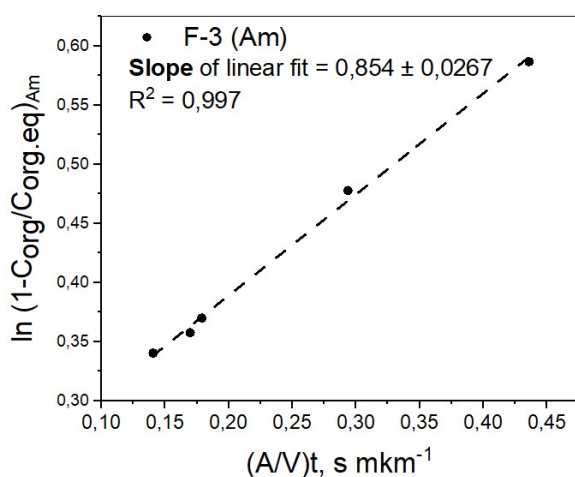

a)

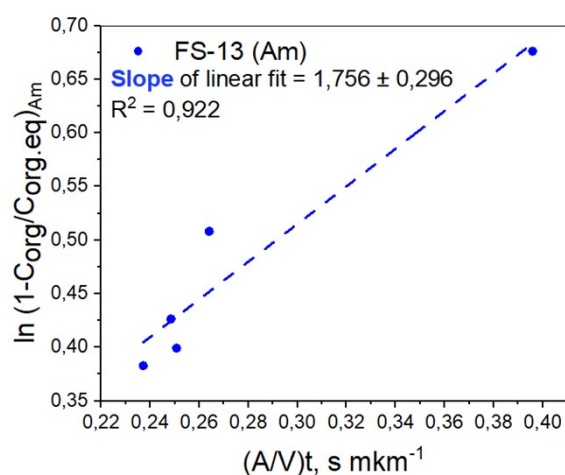

b)

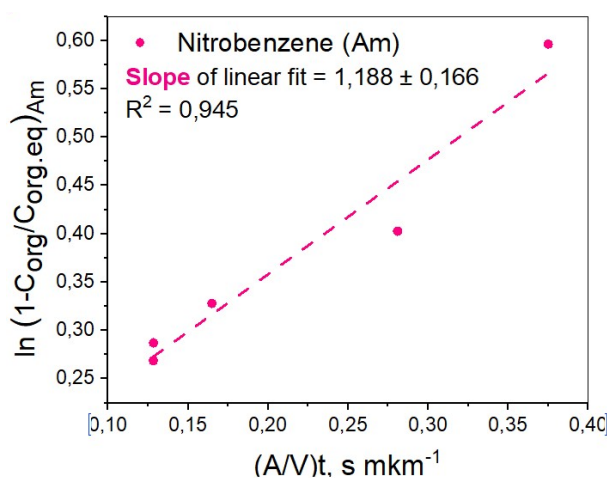

c)

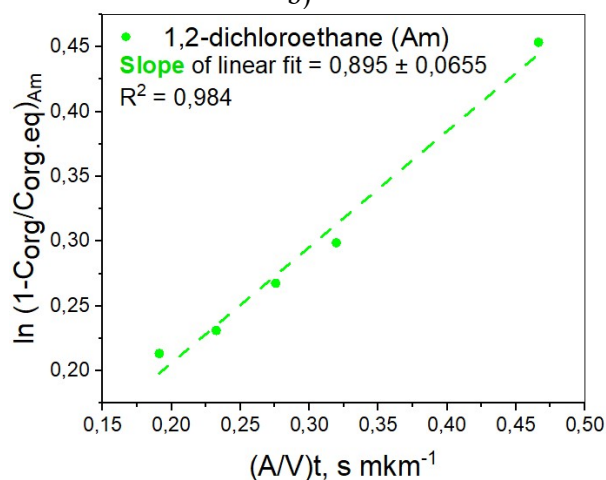

d)

Figure S4. mass transfer rates ( $k_{oa}$ ) for Am(III) extraction. **Organic phase:**  $C(L) = 0.05\ mol\ L^{-1}$ , in a) F-3, b) FS-13, c) Nitrobenzene and d) 1,2-dichloroethane, **Aqueous phase:**  $C(HNO_3) = 3$

mol L<sup>-1</sup> with <sup>152</sup>Eu, <sup>241</sup>Am radiotracer,  $T = 23 \pm 1$  °C.

## Detection and Measurement of Droplets in Tubes Using Advanced Computer Vision Techniques

The measured distances ( $l_1, l_2, l_3, l_4$ ) were then used to calculate the volumes of the aqueous ( $V_{\text{aq}}$ ) and organic ( $V_{\text{org}}$ ) phases of the droplets. These calculations were performed using the following equations:

$$A = 2\pi a^2 \left( 1 + \frac{c^2}{ea^2} \tanh^{-1} e \right)$$

where  $e^2 = 1 - c^2 / a^2$ ,  $a$  – inner radius of the capillary tube,  $c = (l_1 - l_2) / 2$ .

$$V_{\text{aq}} = \pi a^2 l_2 + \frac{4}{3} \pi a^2 \frac{(l_1 - l_2)}{2}$$

$$V_{\text{org}} = \pi a^2 l_4 - \frac{4}{3} \pi a^2 \frac{(l_4 - l_3)}{2}$$

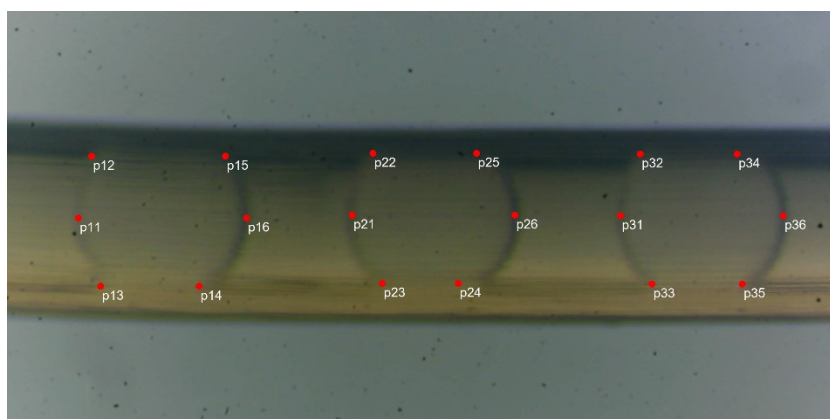

Figure S5. An example of the resulting markup for droplets

## Molecular dynamics

Table S4. Experimental and calculated density of solvents

| Organic Name                                               | Density |       | Dev, % | Ref. |
|------------------------------------------------------------|---------|-------|--------|------|
|                                                            | EXP     | MD    |        |      |
| Phenyl Trifluoromethyl Sulfone<br>density ( <b>FS-13</b> ) | 1.476   | 1.475 | 0      | [1]  |
| 3-nitrobenzoic trifluoride ( <b>F-3</b> )                  | 1.41    | 1.443 | 2      |      |
| Nitrobenzene                                               | 1.204   | 1.194 | 1      | [2]  |
| Toluene                                                    | 0.867   | 0.874 | 1      | [3]  |
| 1,2-Dichloroethane                                         | 1.235   | 1.289 | 4      |      |

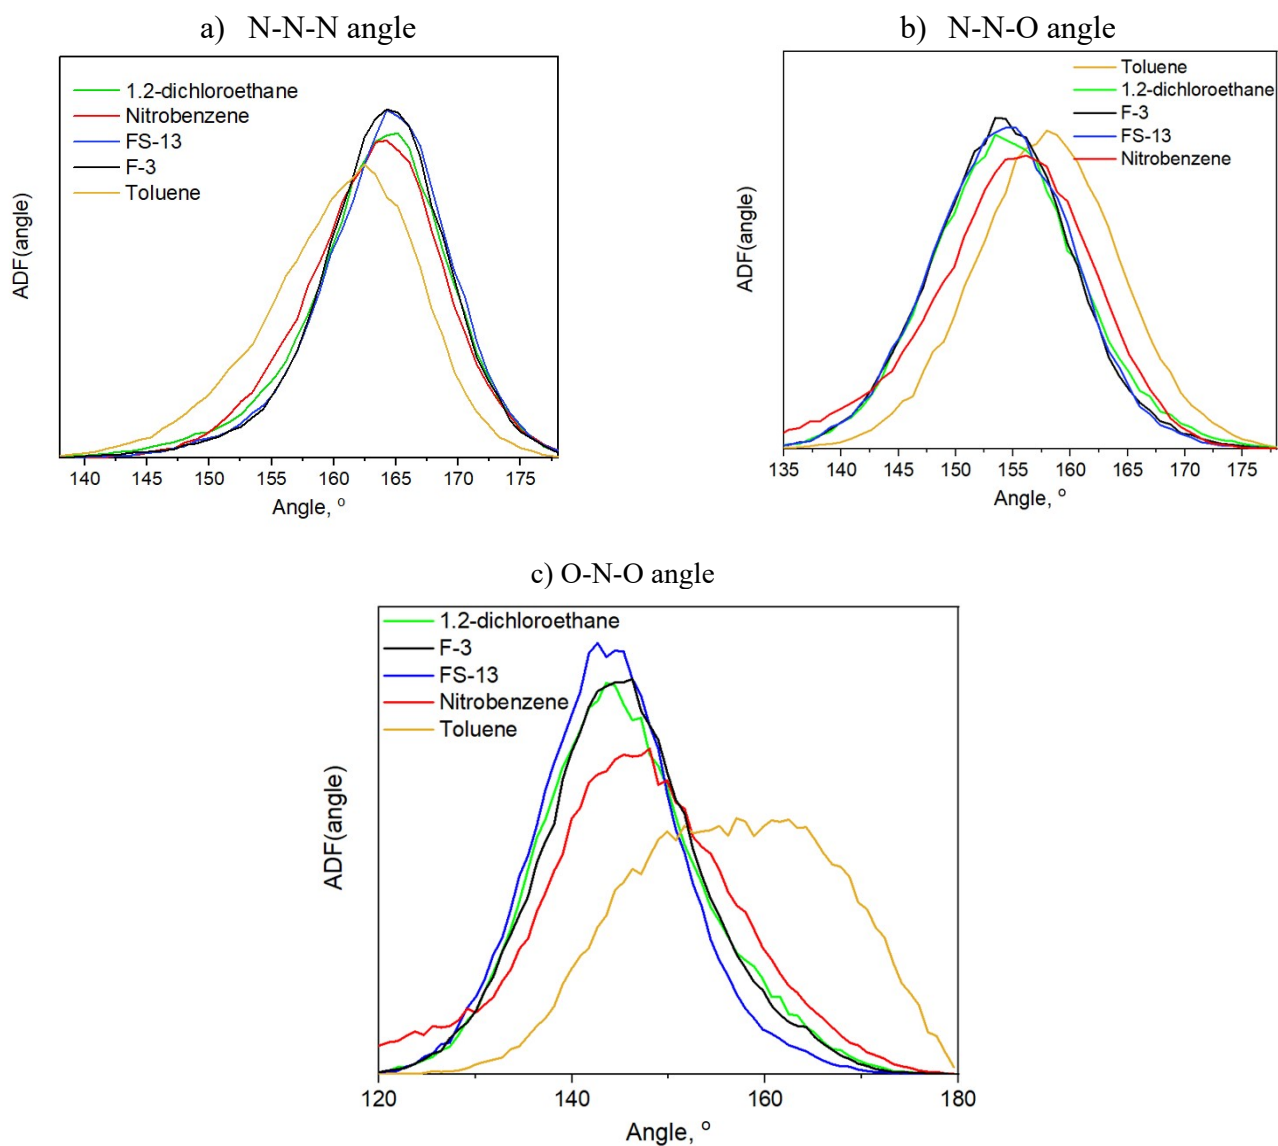

Figure S6. Angular distribution function (ADF) for ligand binding sites

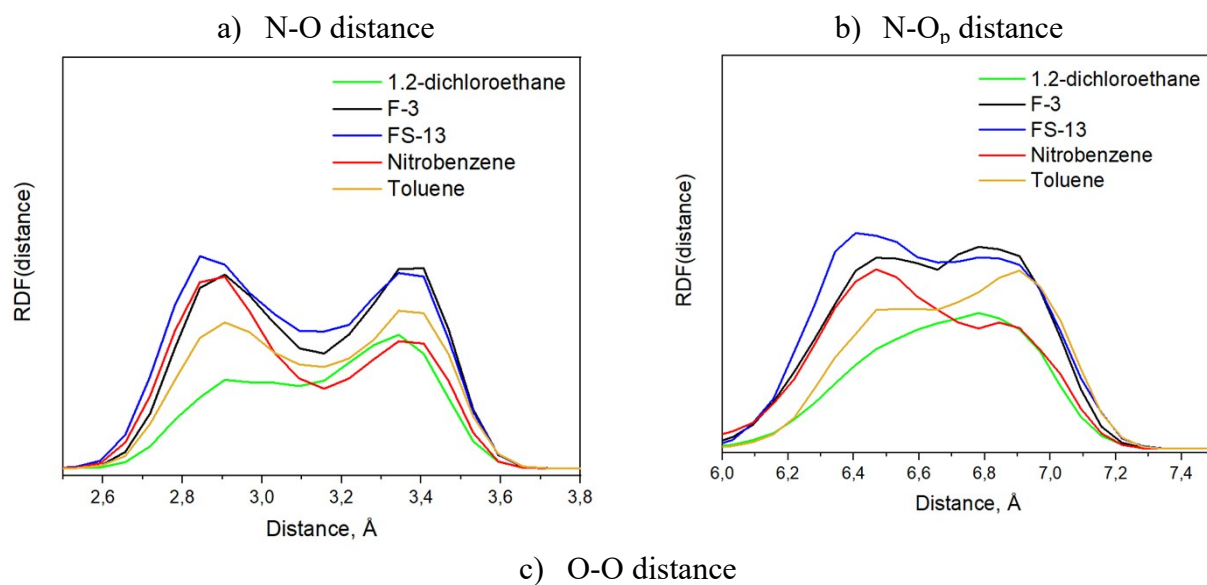

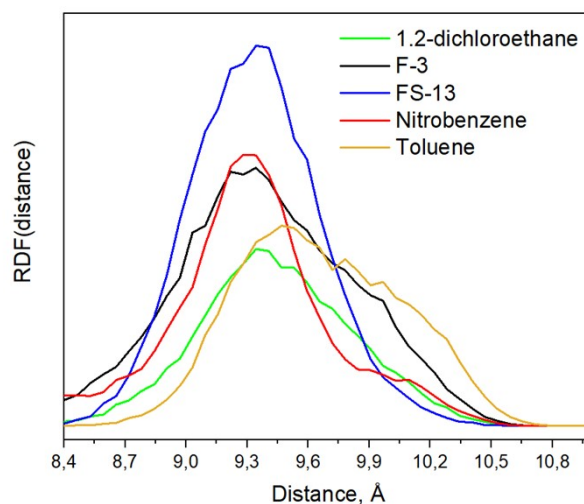

Figure S7. Radial distribution function (RDF) for ligand binding sites

Table S5. Angles and distances between the coordination centers of L obtained from the corresponding distribution functions or crystal data. The error in determining angles is 1 degree, and distances – 0.01 angstroms.

| Solvent                                                | Distance, Å  |                            |                | Angle, °           |                 |                  |
|--------------------------------------------------------|--------------|----------------------------|----------------|--------------------|-----------------|------------------|
|                                                        | N-O<br>(Red) | N-O <sub>p</sub><br>(Blue) | O-O<br>(Green) | N-N-<br>N<br>(Red) | O-N-N<br>(Blue) | O-N-O<br>(Green) |
| Nitrobenzene                                           | 2.91/3.41    | 6.47/6.84                  | 9.38           | 164                | 156             | 147              |
| FS-13                                                  | 2.84/3.40    | 6.40/6.83                  | 9.34           | 165                | 154             | 145              |
| F-3                                                    | 2.91/3.40    | 6.50/6.78                  | 9.28/9.97      | 165                | 153             | 145              |
| 1,2-Dichloroethane                                     | 2.90/3.33    | 6.47/6.78                  | 9.34           | 166                | 153             | 145              |
| Toluene                                                | 2.93/3.38    | 6.47/6.91                  | 9.53/9.97      | 162                | 158             | 157              |
| Crystal data for L                                     | 3.49         | 6.98                       | 10.43          | 160                | 159             | 170              |
| Crystal data for<br>EuL(NO <sub>3</sub> ) <sub>3</sub> | 2.64         | 4.45                       | 4.76           | 150                | 114             | 82               |

1. V. Babain M. Alyapyshev C.E., Todd T. Fluorinated Diluents- A Review // Solvent Extr. Ion Exch. Taylor & Francis, 2023. Vol. 41, № 3. P. 253–291.
2. Davies L. et al. Nitrobenzene. World Health Organization, 2003.
3. Properties of Solvents Used in Organic Chemistry [Electronic resource]. URL: <http://murov.info/orgsolvents.htm>.
